# Supplementary material for: Exploring the long-term effect of plastic on compost microbiome
Source: PLoS One. 2019 Mar 25;14(3):e0214376. doi: 10.1371/journal.pone.0214376 (PMC6433246; doi:10.1371/journal.pone.0214376)
Supplement: S9 Table — The phyla unique to compost microbial community co-occurrence network are in bold font and in color. (XLSX) [file pone.0214376.s012.xlsx]

## Sheet: Nodes_stat_01_0_5.csv
Table S9. Nodes unique to bulk compost network. The phyla unique to compost microbial community co-occurrence network are in bold font and in color.
Taxa	BetweennessCentrality	ClosenessCentrality	Degree
k__Bacteria.p__Actinobacteria.c__Actinobacteria.o__Actinomycetales.f__Thermomonosporaceae.g__Actinomadura	0.287488	0.376471	8
k__Bacteria.p__Bacteroidetes.c__Flavobacteriia.o__Flavobacteriales.f__Flavobacteriaceae.g__Flavobacterium	0.00013779	0.247104	2
k__Bacteria.p__Bacteroidetes.c__Sphingobacteriia.o__Sphingobacteriales.f__Sphingobacteriaceae.g__Sphingobacterium	0.00914706	0.261224	4
k__Bacteria.p__Chlamydiae.c__Chlamydiia.o__Chlamydiales.f__Rhabdochlamydiaceae.g__Candidatus.Rhabdochlamydia	0.00645904	0.271186	8
k__Bacteria.p__Proteobacteria.c__Alphaproteobacteria.o__.f__.g__	0.100476	0.289593	6
k__Bacteria.p__Proteobacteria.c__Alphaproteobacteria.o__Rhizobiales.f__Hyphomicrobiaceae.g__Devosia	0.157132	0.338624	7
k__Bacteria.p__Proteobacteria.c__Betaproteobacteria.o__Burkholderiales.f__Comamonadaceae.g__	0.002042	0.237037	6
k__Bacteria.p__Proteobacteria.c__Deltaproteobacteria.o__Myxococcales.f__Haliangiaceae.g__	0.153122	0.324873	5
k__Bacteria.p__Proteobacteria.c__Gammaproteobacteria.o__Alteromonadales.f__Alteromonadaceae.g__Cellvibrio	0.0243769	0.284444	5
k__Bacteria.p__Proteobacteria.c__Gammaproteobacteria.o__Methylococcales.Other.Other	0.0378185	0.297674	5
k__Bacteria.p__Proteobacteria.c__Gammaproteobacteria.o__Thiotrichales.f__Piscirickettsiaceae.g__	0.00211135	0.278261	7
k__Bacteria.p__Proteobacteria.c__Gammaproteobacteria.o__Xanthomonadales.f__Xanthomonadaceae.g__Luteimonas	0.038741	0.294931	11
k__Bacteria.p__Proteobacteria.c__Gammaproteobacteria.o__Xanthomonadales.f__Xanthomonadaceae.g__Rhodanobacter	0.00996053	0.312195	5
k__Bacteria.p__Proteobacteria.c__Gammaproteobacteria.o__Xanthomonadales.f__Xanthomonadaceae.Other	0	0.228571	1
k__Fungi.p__Ascomycota.c__Dothideomycetes.o__Pleosporales.o._._Pleosporales_unclassified.o._._Pleosporales_unclassified	0.00022269	0.26556	3
k__Fungi.p__Ascomycota.c__Eurotiomycetes.o__Onygenales.f__Onygenaceae.g__Mallochia	0.0639018	0.316832	7
k__Fungi.p__Ascomycota.c__Pezizomycetes.o__Pezizales.f__Pyronemataceae.g__Pseudaleuria	0.05002	0.242424	4
k__Fungi.p__Ascomycota.c__Pezizomycetes.o__unidentified.f__unidentified.g__unidentified	0.0001383	0.267782	5
k__Fungi.p__Ascomycota.c__Sordariomycetes.o__Hypocreales.f__Hypocreales_fam_Incertae_sedis.f._._Hypocreales._fam._Incertae._sedis_unclassified	0	0.195122	2
k__Fungi.p__Ascomycota.c__Sordariomycetes.o__Microascales.f__Microascaceae.g__Scedosporium	0	0.230216	1
k__Fungi.p__Ascomycota.c__Sordariomycetes.o__Microascales.f__Microascaceae.g__Scopulariopsis	0.0423905	0.261224	3
k__Fungi.p__Ascomycota.c__Sordariomycetes.o__Sordariales.f__Chaetomiaceae.f._._Chaetomiaceae_unclassified	0	0.22695	1
k__Fungi.p__Ascomycota.c__Sordariomycetes.o__Sordariales.o._._Sordariales_unclassified.o._._Sordariales_unclassified	0.0550544	0.235294	2
