# Supplementary material for: Exploring the long-term effect of plastic on compost microbiome
Source: PLoS One. 2019 Mar 25;14(3):e0214376. doi: 10.1371/journal.pone.0214376 (PMC6433246; doi:10.1371/journal.pone.0214376)
Supplement: S12 Table — (XLSX) [file pone.0214376.s015.xlsx]

## Sheet: Edges_stat_01_0_5_plastics.csv
Table S12. Associations common to both bulk and plastic-associated compost microbial community co-occurrence networks.
Taxa	nc_plastic	p_plastic	nc_bulk	p_bulk
k__Bacteria.p__Bacteroidetes.c__.Saprospirae..o__.Saprospirales..f__Saprospiraceae.g__ (interacts with) k__Bacteria.p__Bacteroidetes.c__Cytophagia.o__Cytophagales.f__Flammeovirgaceae.g__	0.734872	8.68e-05	0.724615	0.000372463
k__Bacteria.p__Bacteroidetes.c__Cytophagia.o__Cytophagales.f__Flammeovirgaceae.g__ (interacts with) k__Bacteria.p__Bacteroidetes.c__Cytophagia.o__Cytophagales.f__Cyclobacteriaceae.g__	0.582051	0.000530819	0.602564	0.00599048
k__Bacteria.p__Bacteroidetes.c__Flavobacteriia.o__Flavobacteriales.f__Flavobacteriaceae.g__ (interacts with) k__Bacteria.p__Bacteroidetes.c__Flavobacteriia.o__Flavobacteriales.f__Flavobacteriaceae.Other	0.731282	6.37e-05	0.678462	0.00013988
k__Bacteria.p__Bacteroidetes.c__Flavobacteriia.o__Flavobacteriales.f__Flavobacteriaceae.g__Aequorivita (interacts with) k__Bacteria.p__Bacteroidetes.c__Flavobacteriia.o__Flavobacteriales.f__Flavobacteriaceae.g__	0.679487	0.000102577	0.512821	0.00417046
k__Bacteria.p__Bacteroidetes.c__Sphingobacteriia.o__Sphingobacteriales.f__Sphingobacteriaceae.g__ (interacts with) k__Bacteria.p__Bacteroidetes.c__Flavobacteriia.o__Flavobacteriales.f__Flavobacteriaceae.g__	0.505641	0.00519642	0.597436	0.000558418
k__Bacteria.p__Gemmatimonadetes.c__Gemm.1.o__.f__.g__ (interacts with) k__Bacteria.p__Acidobacteria.c__Acidobacteria.6.o__iii1.15.f__.g__	0.577436	6.34e-05	0.868205	4.99e-07
k__Bacteria.p__Gemmatimonadetes.c__Gemm.5.o__.f__.g__ (interacts with) k__Bacteria.p__Chloroflexi.c__Anaerolineae.o__CFB.26.f__.g__	0.666154	8.61e-05	0.590769	0.000204044
k__Bacteria.p__Proteobacteria.c__Alphaproteobacteria.o__Caulobacterales.f__Caulobacteraceae.g__Mycoplana (interacts with) k__Bacteria.p__Bacteroidetes.c__Flavobacteriia.o__Flavobacteriales.f__Flavobacteriaceae.g__	0.529744	0.00134081	0.597436	0.000263247
k__Bacteria.p__Proteobacteria.c__Alphaproteobacteria.o__Rhizobiales.Other.Other (interacts with) k__Bacteria.p__Acidobacteria.c__Acidobacteria.6.o__iii1.15.f__.g__	0.501538	0.00409357	0.51641	0.00311342
k__Bacteria.p__Proteobacteria.c__Alphaproteobacteria.o__Rhodobacterales.f__Hyphomonadaceae.g__ (interacts with) k__Bacteria.p__Bacteroidetes.c__Sphingobacteriia.o__Sphingobacteriales.f__Sphingobacteriaceae.g__	-0.578974	0.000432764	-0.589744	0.00287879
k__Bacteria.p__Proteobacteria.c__Alphaproteobacteria.o__Rhodospirillales.f__Rhodospirillaceae.g__ (interacts with) k__Bacteria.p__Acidobacteria.c__Acidobacteria.6.o__iii1.15.f__.g__	0.650256	8.18e-05	0.800513	4.7e-06
k__Bacteria.p__Proteobacteria.c__Alphaproteobacteria.o__Rhodospirillales.f__Rhodospirillaceae.g__ (interacts with) k__Bacteria.p__Bacteroidetes.c__Flavobacteriia.o__Flavobacteriales.f__.Weeksellaceae..g__Chryseobacterium	-0.589744	0.00207934	-0.733333	0.000473121
k__Bacteria.p__Proteobacteria.c__Alphaproteobacteria.o__Rhodospirillales.f__Rhodospirillaceae.g__ (interacts with) k__Bacteria.p__Bacteroidetes.c__Sphingobacteriia.o__Sphingobacteriales.f__Sphingobacteriaceae.g__	-0.57641	0.00901682	-0.727692	5.95e-05
k__Bacteria.p__Proteobacteria.c__Alphaproteobacteria.o__Rhodospirillales.f__Rhodospirillaceae.g__ (interacts with) k__Bacteria.p__Gemmatimonadetes.c__Gemm.1.o__.f__.g__	0.602564	0.000162338	0.85641	1.17e-06
k__Bacteria.p__Proteobacteria.c__Alphaproteobacteria.o__Rhodospirillales.f__Rhodospirillaceae.g__ (interacts with) k__Bacteria.p__Proteobacteria.c__Alphaproteobacteria.o__Rhizobiales.Other.Other	0.573333	0.00116165	0.656923	0.00057788
k__Bacteria.p__Proteobacteria.c__Betaproteobacteria.o__Burkholderiales.f__Alcaligenaceae.g__ (interacts with) k__Bacteria.p__Bacteroidetes.c__Flavobacteriia.o__Flavobacteriales.f__Flavobacteriaceae.g__Aequorivita	0.672821	0.000303345	0.566667	0.00557352
k__Bacteria.p__Proteobacteria.c__Betaproteobacteria.o__Burkholderiales.f__Alcaligenaceae.g__ (interacts with) k__Bacteria.p__Bacteroidetes.c__Sphingobacteriia.o__Sphingobacteriales.f__Sphingobacteriaceae.g__	0.529744	0.00215029	0.597436	0.00291489
k__Bacteria.p__Proteobacteria.c__Betaproteobacteria.o__Burkholderiales.f__Alcaligenaceae.g__ (interacts with) k__Bacteria.p__Proteobacteria.c__Alphaproteobacteria.o__Caulobacterales.f__Caulobacteraceae.g__Mycoplana	0.634359	0.00338107	0.523077	0.0018436
k__Bacteria.p__Proteobacteria.c__Betaproteobacteria.o__MND1.f__.g__ (interacts with) k__Bacteria.p__Acidobacteria.c__Acidobacteria.6.o__iii1.15.f__.g__	0.740513	7.52e-06	0.685128	7.21e-05
k__Bacteria.p__Proteobacteria.c__Betaproteobacteria.o__MND1.f__.g__ (interacts with) k__Bacteria.p__Gemmatimonadetes.c__Gemm.1.o__.f__.g__	0.699487	3.89e-05	0.544615	0.00132972
k__Bacteria.p__Proteobacteria.c__Deltaproteobacteria.o__Myxococcales.f__.g__ (interacts with) k__Bacteria.p__Acidobacteria.c__Acidobacteria.6.o__iii1.15.f__.g__	0.590769	0.0014806	0.589231	0.0012438
k__Bacteria.p__Proteobacteria.c__Gammaproteobacteria.o__Pseudomonadales.f__Moraxellaceae.g__Psychrobacter (interacts with) k__Bacteria.p__Bacteroidetes.c__Flavobacteriia.o__Flavobacteriales.f__.Weeksellaceae..g__Chryseobacterium	0.634359	0.000364542	0.604103	0.00123234
k__Bacteria.p__Proteobacteria.c__Gammaproteobacteria.o__Pseudomonadales.f__Moraxellaceae.g__Psychrobacter (interacts with) k__Bacteria.p__Proteobacteria.c__Alphaproteobacteria.o__Rhodospirillales.f__Rhodospirillaceae.g__	-0.589231	0.00361514	-0.693846	0.000486478
k__Bacteria.p__Proteobacteria.c__Gammaproteobacteria.o__Xanthomonadales.f__Sinobacteraceae.g__ (interacts with) k__Bacteria.p__Acidobacteria.c__Acidobacteria.6.o__iii1.15.f__.g__	0.627692	0.000192676	0.739487	0.000245925
k__Bacteria.p__Proteobacteria.c__Gammaproteobacteria.o__Xanthomonadales.f__Sinobacteraceae.g__ (interacts with) k__Bacteria.p__Bacteroidetes.c__Sphingobacteriia.o__Sphingobacteriales.f__Sphingobacteriaceae.g__	-0.556923	0.00368228	-0.56359	0.000820383
k__Bacteria.p__Proteobacteria.c__Gammaproteobacteria.o__Xanthomonadales.f__Sinobacteraceae.g__ (interacts with) k__Bacteria.p__Gemmatimonadetes.c__Gemm.1.o__.f__.g__	0.798974	4.78e-06	0.670256	0.000158823
k__Bacteria.p__Proteobacteria.c__Gammaproteobacteria.o__Xanthomonadales.f__Sinobacteraceae.g__ (interacts with) k__Bacteria.p__Proteobacteria.c__Alphaproteobacteria.o__Rhodospirillales.f__Rhodospirillaceae.g__	0.724615	7.24e-05	0.595897	0.00096005
k__Bacteria.p__Proteobacteria.c__Gammaproteobacteria.o__Xanthomonadales.f__Sinobacteraceae.g__ (interacts with) k__Bacteria.p__Proteobacteria.c__Betaproteobacteria.o__MND1.f__.g__	0.674359	0.000100057	0.593333	0.00112711
k__Bacteria.p__Proteobacteria.c__Gammaproteobacteria.o__Xanthomonadales.f__Xanthomonadaceae.g__Lysobacter (interacts with) k__Bacteria.p__Bacteroidetes.c__Flavobacteriia.o__Flavobacteriales.f__.Weeksellaceae..g__Chryseobacterium	0.719487	0.00108124	0.564103	0.00354184
k__Fungi.p__Ascomycota.c__Eurotiomycetes.o__Eurotiales.f__Eurotiales_fam_Incertae_sedis.g__Thermomyces (interacts with) k__Bacteria.p__Gemmatimonadetes.c__Gemm.5.o__.f__.g__	0.638974	2.54e-05	0.561026	2.42e-05
k__Fungi.p__Ascomycota.c__Eurotiomycetes.o__Eurotiales.f__Eurotiales_fam_Incertae_sedis.g__Thermomyces (interacts with) k__Fungi.p__Ascomycota.c__Dothideomycetes.o__Pleosporales.f__Sporormiaceae.g__Preussia	-0.680988	0.000276633	-0.606874	0.00184903
k__Fungi.p__Ascomycota.c__Pezizomycetes.o__Pezizales.f__Pyronemataceae.g__Cleistothelebolus (interacts with) k__Fungi.p__Ascomycota.c__Leotiomycetes.o__Leotiomycetes_ord_Incertae_sedis.f__Leotiomycetes_fam_Incertae_sedis.g__Geomyces	0.577436	0.00143834	0.546667	0.00251512
k__Fungi.p__Ascomycota.c__Sordariomycetes.o__Microascales.f__unidentified.g__unidentified (interacts with) k__Bacteria.p__Gemmatimonadetes.c__Gemm.5.o__.f__.g__	-0.727692	0.000188228	-0.687179	0.00029503
k__Fungi.p__Ascomycota.c__Sordariomycetes.o__Microascales.f__unidentified.g__unidentified (interacts with) k__Fungi.p__Ascomycota.c__Eurotiomycetes.o__Eurotiales.f__Eurotiales_fam_Incertae_sedis.g__Thermomyces	-0.628205	0.000752994	-0.91641	3.09e-05
k__Fungi.p__Basidiomycota.c__Microbotryomycetes.o__Sporidiobolales.f__Sporidiobolales_fam_Incertae_sedis.g__Sporobolomyces (interacts with) k__Fungi.p__Ascomycota.c__Pezizomycetes.o__Pezizales.f__Pyronemataceae.g__Cleistothelebolus	0.670256	0.000465242	0.546667	0.000730591
